# Supplementary material
Source: PubMed Central journal article supplement (PMC1413631)

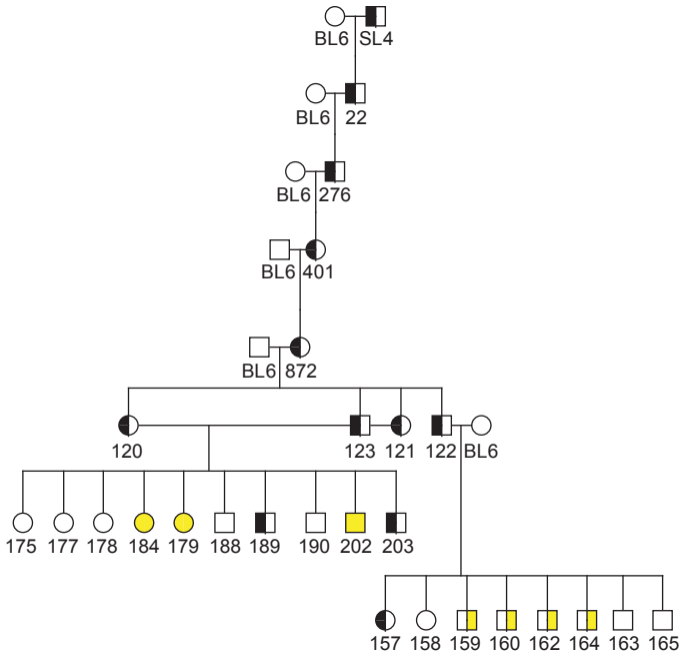

Supplement: pnas_0507444103_1.pdf [file pnas_0507444103_1.pdf]

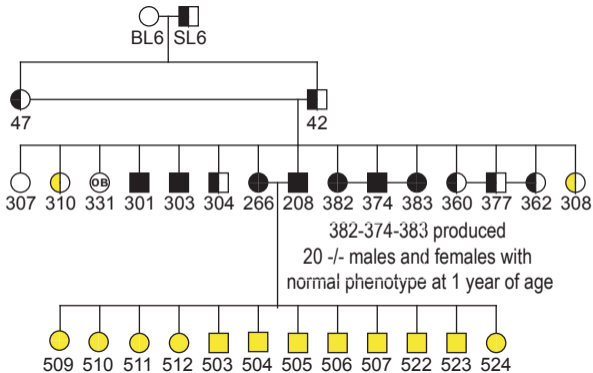

Supplement: pnas_0507444103_2.pdf [file pnas_0507444103_2.pdf]

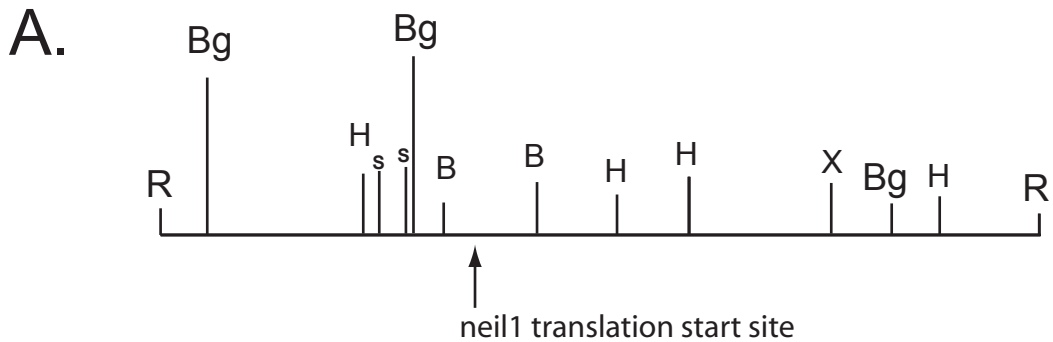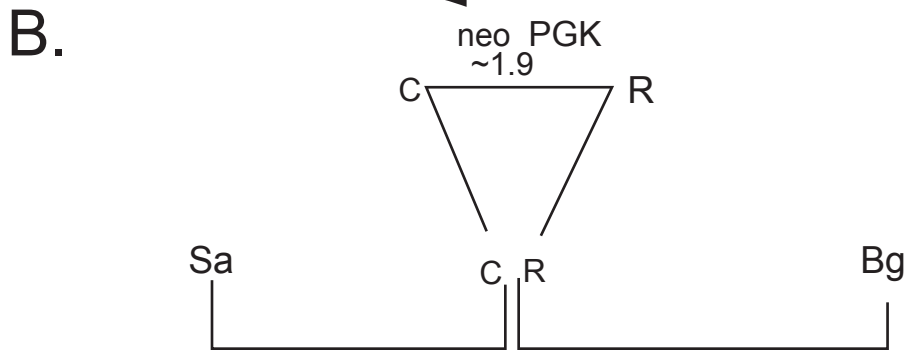

Supplement: pnas_0507444103_3.pdf [file pnas_0507444103_3.pdf]
